# Supplementary material for: Efficacy of Azithromycin and Compounded Atovaquone for Treatment of Babesia gibsoni in Dogs
Source: PubMed Central journal article supplement — J Vet Intern Med. 2017 Jun 17;31(4):1108–12. doi: 10.1111/jvim.14777 (PMC5508350; doi:10.1111/jvim.14777), 2017-06-17
Supplement: JVIM-31-1108-s001.pdf [file JVIM-31-1108-s001.pdf]

- 1 **Supplemental Table 1.** Serological and PCR testing results for *Babesia gibsoni* after 10 days of  
 2 treatment with azithromycin and atovaquone.

| Dog no. | Site of origin | Age at treatment | Pre-treatment serology | Pre-treatment PCR | Post-treatment PCR day 30 | Post-treatment PCR day 60 | Post-treatment PCR day 90 |
|---------|----------------|------------------|------------------------|-------------------|---------------------------|---------------------------|---------------------------|
| 1       | 1              | Adult            | +                      | +                 | -                         | -                         | ND                        |
| 2       | 1              | Adult            | +                      | +                 | -                         | -                         | ND                        |
| 3       | 1              | Adult            | +                      | +                 | -                         | -                         | ND                        |
| 4       | 1              | Adult            | +                      | +                 | -                         | +                         | +*                        |
| 5       | 1              | Adult            | +                      | +                 | -                         | -                         | ND                        |
| 6       | 1              | Adult            | +                      | +                 | -                         | -                         | ND**                      |
| 7       | 1              | Adult            | +                      | +                 | -                         | -                         | -                         |
| 8       | 1              | Adult            | +                      | +                 | -                         | -                         | ND                        |
| 9       | 1              | Adult            | +                      | +                 | -                         | -                         | ND                        |
| 10      | 1              | Adult            | +                      | +                 | -                         | -                         | ND**                      |
| 11      | 1              | Adult            | +                      | +                 | -                         | -                         | ND                        |
| 12      | 1              | Adult            | +                      | +                 | -                         | -                         | ND                        |
| 13      | 1              | Adult            | +                      | +                 | -                         | -                         | ND                        |
| 14      | 1              | Adult            | +                      | +                 | -                         | -                         | ND**                      |
| 15      | 1              | 10 weeks         | ND                     | +                 | +                         | -                         | -**                       |
| 16      | 1              | 10 weeks         | ND                     | +                 | -                         | +                         | +                         |
| 17      | 1              | Adult            | +                      | +                 | -                         | -                         | ND                        |
| 18      | 1              | Adult            | +                      | +                 | -                         | -                         | ND**                      |
| 19      | 1              | Adult            | +                      | +                 | -                         | -                         | ND                        |
| 20      | 2              | Adult            | +                      | +                 | -                         | -                         | ND                        |
| 21      | 2              | Adult            | +                      | +                 | +                         | -                         | -                         |
| 22      | 2              | Adult            | +                      | +                 | -                         | -                         | ND                        |
| 23      | 2              | Adult            | +                      | +                 | -                         | -                         | ND                        |
| 24      | 3              | Adult            | +                      | +                 | -                         | -                         | -                         |
| 25      | 4              | Adult            | +                      | +                 | -                         | -                         | ND                        |
| 26      | 4              | Adult            | +                      | +                 | -                         | -                         | ND                        |
| 27      | 4              | Adult            | +                      | +                 | -                         | -                         | ND                        |

|    |   |          |   |   |   |   |    |
|----|---|----------|---|---|---|---|----|
| 28 | 4 | Adult    | + | + | - | - | -  |
| 29 | 4 | Adult    | + | + | - | - | ND |
| 30 | 4 | Adult    | + | + | - | - | ND |
| 31 | 4 | Adult    | + | + | - | - | ND |
| 32 | 5 | 18 weeks | + | + | - | - | ND |
| 33 | 5 | 20 weeks | + | + | - | - | ND |
| 34 | 5 | 20 weeks | - | + | + | + | +  |
| 35 | 5 | Adult    | + | + | - | - | ND |
| 36 | 5 | Adult    | + | + | - | - | ND |
| 37 | 5 | Adult    | + | + | - | - | ND |
| 38 | 5 | Adult    | + | + | - | - | ND |
| 39 | 5 | 11 weeks | + | + | - | - | ND |
| 40 | 5 | Adult    | + | + | - | - | ND |
| 41 | 5 | Adult    | + | + | - | - | ND |
| 42 | 6 | Adult    | + | + | - | - | ND |

---

3

4 + positive result; - negative result; ND not determined; \*remained PCR-positive after second

5 course of treatment; \*\*PCR-negative 1 year post-treatment
